# Supplementary material for: Two Decades of Research Using Taiwan’s National Health Insurance Claims Data: Bibliometric and Text Mining Analysis on PubMed
Source: PubMed Central journal article supplement (PMC7327589; doi:10.2196/18457), 2020-06-16

**Figure.** Flowchart of included articles.

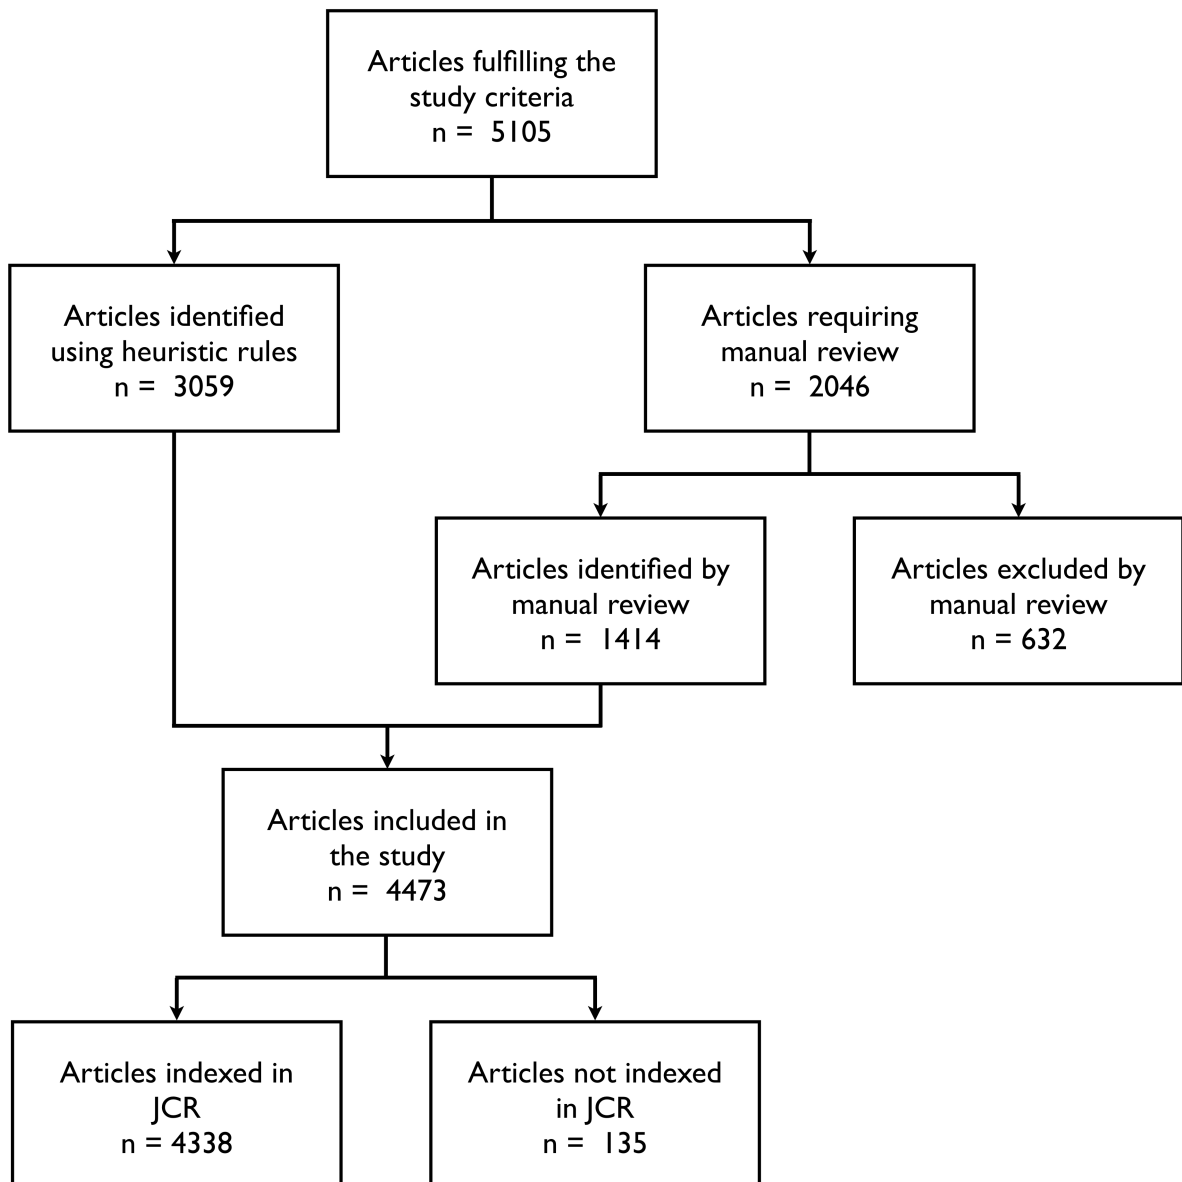

Supplement: jmir_v22i6e18457_app1.pdf [file jmir_v22i6e18457_app1.pdf]
