# Supplementary material for: Two Decades of Research Using Taiwan’s National Health Insurance Claims Data: Bibliometric and Text Mining Analysis on PubMed
Source: PubMed Central journal article supplement (PMC7327589; doi:10.2196/18457), 2020-06-16
Supplement: jmir_v22i6e18457_app2.pdf [file jmir_v22i6e18457_app2.pdf]

**Table.** UMLS semantic types for categorizing medical entities

| Category           | Semantic type                           | Abbreviation |
|--------------------|-----------------------------------------|--------------|
| Medical conditions | Acquired Abnormality                    | acab         |
|                    | Anatomical Abnormality                  | anab         |
|                    | Disease or Syndrome                     | dsyn         |
|                    | Finding                                 | fndg         |
|                    | Injury or Poisoning                     | inpo         |
|                    | Mental or Behavioral Dysfunction        | mobd         |
|                    | Neoplastic Process                      | neop         |
|                    | Pathologic Function                     | patf         |
|                    | Sign or Symptom                         | sosy         |
| Interventions      | Amino Acid, Peptide, or Protein         | aapp         |
|                    | Antibiotic                              | antb         |
|                    | Biologically Active Substance           | bacs         |
|                    | Chemical                                | chem         |
|                    | Clinical Drug                           | clnd         |
|                    | Enzyme                                  | enzy         |
|                    | Hazardous or Poisonous Substance        | hops         |
|                    | Hormone                                 | horm         |
|                    | Immunologic Factor                      | imft         |
|                    | Inorganic Chemical                      | inch         |
|                    | Laboratory Procedure                    | lbpr         |
|                    | Medical Device                          | medd         |
|                    | Nucleic Acid, Nucleoside, or Nucleotide | nnon         |
|                    | Organic Chemical                        | orch         |
|                    | Pharmacologic Substance                 | phsu         |
|                    | Therapeutic or Preventive Procedure     | topp         |
|                    | Vitamin                                 | vita         |

UMLS, Unified Medical Language System.
